# Supplementary material
Source: HighWire-hosted journal article supplement (https://www.cmajopen.ca/highwire/filestream/89163/field_highwire_adjunct_files/2/open-2021-0118-3-at.pdf)
Supplement: open-2021-0118-3-at.pdf [file open-2021-0118-3-at.pdf]

**Supplementary Table 3:** Procedure codes and description from DAD and NACRS-SDS databases.

| <b>DAD / NACRS-SDS Procedure Code</b> | <b>Procedure Description</b>                                                                                                                                                                |
|---------------------------------------|---------------------------------------------------------------------------------------------------------------------------------------------------------------------------------------------|
| 1TV74LANW                             | Fixation, radius and ulna open approach no tissue used using plate, screw                                                                                                                   |
| 1TH80WUNW                             | Repair, tendons of the arm [around shoulder] using tenodesis with screw fixation [e.g. tendon with a bone plug fixed to bone with screw] Simple repair (without graft or transfer involved) |
| 1TV87LAPM                             | Excision partial, radius and ulna no tissue used (for closure of defect) using endoprosthesis [radial or humeral head]                                                                      |
| 1UB74LAKDA                            | Fixation, wrist joint open approach with bone autograft using wire, mesh, staple                                                                                                            |
| 1UF74LAKDA                            | Fixation, other metacarpal bones open approach with bone autograft using wire, staple                                                                                                       |
| 1UF80LA                               | Repair, other metacarpal bones no tissue used (for repair) no device used                                                                                                                   |
| 1UI93LAXXE                            | Amputation, first phalanx of hand using local flap [e.g. V-Y plasty]                                                                                                                        |
| 1UM75LAKD                             | Fusion, first interphalangeal joint of hand open approach using wire, tension band                                                                                                          |
| 1VX52LA                               | Drainage, soft tissue of leg using open (incisional) approach                                                                                                                               |
| 1YU87LAXXA                            | Excision partial, skin of hand open [excisional] approach using full thickness autograft                                                                                                    |
| 1BN87LAXXQ                            | Excision partial, nerve(s) of forearm and wrist end to end [rejoining] technique (e.g. suture, glue) combined transposition of nerves with a nerve autograft                                |
| 1BQ87WF                               | Excision partial, nerve(s) of digit of hand no rejoining [of nerve ends] nerve end buried                                                                                                   |
| 1JU51LA                               | Occlusion, veins of arm NEC using open approach                                                                                                                                             |
| 1UC79HAKC                             | Repair by increasing size, distal radioulnar joint and carpal joints and bones no tissue used in lengthening [or distracting] using external fixator device [for distraction]               |
| 1TX87LAXXA                            | Excision partial, soft tissue of arm NEC using open approach and autograft [e.g. fascia or skin] (to close surgical defect)                                                                 |
| 1UB55JAGX                             | Removal of device, wrist joint of device NEC using external approach                                                                                                                        |
| 1UB87GB                               | Excision partial, wrist joint endoscopic [arthroscopic] approach, synovectomy [dissection] alone                                                                                            |
| 1UF55LANW                             | Removal of device, other metacarpal bones of plate/screw using open approach                                                                                                                |
| 1TA80LA                               | Repair, shoulder joint open approach using simple apposition technique only [e.g. suturing]                                                                                                 |
| 1UB52WK                               | Drainage, wrist joint using open incisional approach [e.g. bursotomy]                                                                                                                       |
| 1UB80LAXXA                            | Repair, wrist joint open approach using autograft [e.g. bone, interpositional fascia lata, muscle graft, rolled òanchovyö graft]                                                            |
| 1UE73JA                               | Reduction, first metacarpal bone using closed (external) approach                                                                                                                           |
| 1UI73LA                               | Reduction, first phalanx of hand using open approach                                                                                                                                        |
| 1UB74DANW                             | Fixation, wrist joint endoscopic [arthroscopic] approach fixation device alone using plate, screw                                                                                           |

|            |                                                                                                                                                                                               |
|------------|-----------------------------------------------------------------------------------------------------------------------------------------------------------------------------------------------|
| 1UB74LANWQ | Fixation, wrist joint open approach with combined sources of tissue [e.g. bone graft, cement/paste] using plate, screw                                                                        |
| 1UC75LAKD  | Fusion, distal radioulnar joint and carpal joints and bones fixation device [alone] using wire, staple                                                                                        |
| 1UF93LAXXE | Amputation, other metacarpal bones using local flap [e.g. myoplasty or myodesis] (for closure of stump)                                                                                       |
| 1UI56LA    | Removal of foreign body, first phalanx of hand using open approach                                                                                                                            |
| 1UK53LAPM  | Implantation of internal device, other interphalangeal joints of hand of uncemented single-component prosthetic device using open approach                                                    |
| 1UB53LAPM  | Implantation of internal device, wrist joint uncemented single-component prosthetic device [e.g. styloid process of radius]                                                                   |
| 1UB80DA    | Repair, wrist joint endoscopic [arthroscopic] approach using simple apposition technique only [e.g. suturing]                                                                                 |
| 1UJ93LAXXF | Amputation, other phalanx of hand using free flap [e.g. toe-to-finger flap]                                                                                                                   |
| 1UK55HAKD  | Removal of device, other interphalangeal joints of hand of wire/staple using percutaneous approach                                                                                            |
| 1UM73LA    | Reduction, first interphalangeal joint of hand using open approach                                                                                                                            |
| 1UJ55LANW  | Removal of device, other phalanx of hand of plate/screw using open approach                                                                                                                   |
| 1UJ74LAKDN | Fixation, other phalanx of hand open approach with synthetic tissue [bone cement, paste] using wire, staple, tension band                                                                     |
| 1UK80LAKDA | Repair, other interphalangeal joints of hand joint repair alone with autograft [e.g. bone, interpositional tendon, fascia] using wire, staple, tension band                                   |
| 1UK80LAXXA | Repair, other interphalangeal joints of hand joint repair alone with autograft [e.g. bone, interpositional tendon, fascia] no device used (for repair)                                        |
| 1UM74LANW  | Fixation, first interphalangeal joint of hand using open approach and screw                                                                                                                   |
| 1UM87LA    | Excision partial, first interphalangeal joint of hand using open approach                                                                                                                     |
| 1US80WUNW  | Repair, extensor tendons of finger [excludes thumb] using tenodesis with screw fixation [tendon with a bone plug fixed to bone with screw] simple repair (without graft or transfer involved) |
| 1UY80LAXXF | Repair, soft tissue of the wrist and hand using open approach and free flap                                                                                                                   |
| 1JM87LAXXA | Excision partial, arteries of arm NEC using autograft open approach                                                                                                                           |
| 1JU80LAXXA | Repair, veins of arm NEC using open approach with autograft                                                                                                                                   |
| 1TQ72WJ    | Release, muscles of the forearm [around elbow] using excisional technique [e.g. fasciectomy]                                                                                                  |
| 1TV74LAKDQ | Fixation, radius and ulna open approach with combined sources of tissue [e.g. bone graft, cement/paste] using wire, mesh, staple                                                              |
| 1UB03JAFG  | Immobilization, wrist joint using binding device (e.g. restrictive dressing, taping)                                                                                                          |
| 1UB74LANVA | Fixation, wrist joint open approach with bone autograft using pin, nail                                                                                                                       |
| 1UE74LANV  | Fixation, first metacarpal bones open approach fixation device alone using pin, nail                                                                                                          |
| 1UG87WJ    | Excision partial, other metacarpophalangeal joint(s) using synovectomy dissection only                                                                                                        |

|            |                                                                                                                                                                             |
|------------|-----------------------------------------------------------------------------------------------------------------------------------------------------------------------------|
| 1UG93LAXXE | Amputation, other metacarpophalangeal joint(s) using local flap myoplasty or myodesis (for closure of stump)                                                                |
| 1TM74LAKDN | Fixation, elbow joint open approach with synthetic tissue[e.g. bone cement, or paste] using wire, mesh, staple                                                              |
| 1TV74LANVQ | Fixation, radius and ulna open approach with combined sources of tissue [e.g. bone graft, cement/paste] using pin, nail                                                     |
| 1UB52HA    | Drainage, wrist joint using percutaneous (needle) approach for aspiration                                                                                                   |
| 1UB53LAPN  | Implantation of internal device, wrist joint uncemented dual-component prosthetic device [e.g. proximal radius and ulnar head with or without scaphoid or lunate component] |
| 1UC89LA    | Excision total, distal radioulnar joint and carpal joints and bones using open approach                                                                                     |
| 1UM80LAKD  | Repair, first interphalangeal joint of hand, joint repair alone no tissue used (for repair) using wire, staple, tension band                                                |
| 1TX87LAXXE | Excision partial, soft tissue of arm NEC using open approach and local transposition flap [e.g. advancement muscle or Z-plasty skin flap] (to close surgical defect)        |
| 1UC80LAXXE | Repair, distal radioulnar joint and carpal joints and bones open approach using local tendon transfer [rebalancing]                                                         |
| 1UH73LA    | Reduction, first metacarpophalangeal joint using open approach                                                                                                              |
| 1UI93LAXXA | Amputation, first phalanx of hand using autograft [e.g. full-thickness skin graft or bone graft] (for closure of stump)                                                     |
| 1UK80LANW  | Repair, other interphalangeal joints of hand joint repair alone no tissue used (for repair) using screw, plate and screw                                                    |
| 1UK80VJKD  | Repair, other interphalangeal joints of hand joint repair with phalangeal osteotomy (for realigning joint) no tissue used (for repair) using wire, staple, tension band     |
| 1UM73JA    | Reduction, first interphalangeal joint of hand using closed (external) approachh                                                                                            |
| 1UM74LANV  | Fixation, first interphalangeal joint of hand using open approach and pin or nail                                                                                           |
| 1UU53LASL  | Implantation of internal device, tendons of thumb [Pollicis tendons] of spacer device [e.g. Silastic rod] (with or without wire or screw) using open approach               |
| 1UJ74LALQ  | Fixation, other phalanx of hand open approach fixation device alone using intramedullary nail                                                                               |
| 1US58LAXXA | Procurement, extensor tendons of finger [excludes thumb] of tendon autograft using open approach                                                                            |
| 1VD58LAXXA | Procurement, muscles of hip and thigh of muscle (or fascia) graft using open approach                                                                                       |
| 1TV56LA    | Removal of foreign body, radius and ulna using open approach                                                                                                                |
| 1UE82LAKD  | Reattachment, first metacarpal bone using wire/staple fixation with apposition technique                                                                                    |
| 1UI80LA    | Repair, first phalanx of hand no tissue used (for repair) no device used                                                                                                    |
| 1UI82LA    | Reattachment, first phalanx of hand using simple apposition technique [e.g. suture]                                                                                         |
| 1UK74HANW  | Fixation, other interphalangeal joints of hand using percutaneous (closed) approach and plate/screw                                                                         |

|            |                                                                                                                                                                                                  |
|------------|--------------------------------------------------------------------------------------------------------------------------------------------------------------------------------------------------|
| 1UT80WUXXE | Repair, flexor tendons of finger [excludes thumb] using tenodesis technique [tendon looped or sutured to or through bone] with tendon transfer for realignment [e.g. advancement, transposition] |
| 1UU80LAXXQ | Repair, tendons of thumb [Pollicis tendons] using apposition technique [e.g. tendon sutured to tendon] with combined sources of tissue [e.g. autograft, tendon transfer, goretex]                |
| 1UB74LANWK | Fixation, wrist joint open approach with bone homograft using plate, screw                                                                                                                       |
| 1UC80LAXXN | Repair, distal radioulnar joint and carpal joints and bones open approach using synthetic tissue [e.g. mesh, gortex, silastic sheath]                                                            |
| 1UG72LA    | Release, other metacarpophalangeal joint(s) using open (incisional) approach                                                                                                                     |
| 1UG75LAKD  | Fusion, other metacarpophalangeal joint(s) joint fusion alone no tissue used (for fusion) using wire, staple, tension band                                                                       |
| 1UH74LANW  | Fixation, first metacarpophalangeal joint open approach, fixation device alone using plate, screw                                                                                                |
| 1UJ71LAXXE | Division, other phalanx of hand division involving skin and soft tissue only (simple syndactyly) using local flap [e.g. volar, dorsal]                                                           |
| 1UJ80LAKDA | Repair, other phalanx of hand using autograft [e.g. bone peg] using wire, staple                                                                                                                 |
| 1UK55LANV  | Removal of device, other interphalangeal joints of hand of pin/nail using open approach                                                                                                          |
| 1UY87LAXXA | Excision partial, soft tissue of the wrist and hand using open approach and autograft [e.g. fascia or skin] (for closure of defect)                                                              |
| 1TV82LANW  | Reattachment, radius and ulna using open approach and plate/screw fixation with apposition technique [e.g. suturing]                                                                             |
| 1UB74LAKDN | Fixation, wrist joint open approach with synthetic tissue [e.g. bone cement, or paste] using wire, mesh, staple                                                                                  |
| 1UF93LAXXA | Amputation, other metacarpal bones using skin graft (for closure of stump)                                                                                                                       |
| 1UG80LANW  | Repair, other metacarpophalangeal joint(s) joint repair alone no tissue used (for repair) using screw, plate and screw                                                                           |
| 1UI80LAKD  | Repair, first phalanx of hand no tissue used (for repair) using wire, staple                                                                                                                     |
| 1UK53LAQD  | Implantation of internal device, other interphalangeal joints of hand of single-component prosthetic device with (additional) wire fixation (for stabilization) using open approach              |
| 1US80LAXXQ | Repair, extensor tendons of finger [excludes thumb] using apposition technique [e.g. tendon sutured to tendon] with combined sources of tissue [e.g. autograft, tendon transfer, goretex]        |
| 1UT80LAXXN | Repair, flexor tendons of finger [excludes thumb] using apposition technique [e.g. tendon sutured to tendon] with synthetic tissue [e.g. gortex, mesh]                                           |
| 1UU80WUNW  | Repair, tendons of thumb [Pollicis tendons] using tenodesis with screw fixation [tendon with a bone plug fixed to bone with screw] simple repair (without graft or transfer involved)            |
| 1VD58LAXXF | Procurement, muscles of hip and thigh of free flap using open approach                                                                                                                           |
| 1BM80UH    | Repair, nerve(s) of upper arm and elbow using interfascicular [split] repair [rejoining] technique                                                                                               |
| 1BM87LAXXQ | Excision partial, nerve(s) of upper arm and elbow end-to-end [rejoining] technique (e.g. suture, glue) combined transposition of nerves with a nerve autograft                                   |

|                   |                                                                                                                                                                                                           |
|-------------------|-----------------------------------------------------------------------------------------------------------------------------------------------------------------------------------------------------------|
| <b>1BP87LAXXA</b> | <b>Excision partial, nerve(s) of hand end to end suture [rejoining] technique nerve autograft (to replace lost length)</b>                                                                                |
| <b>1SY58LAXXF</b> | <b>Procurement, muscles of the chest and abdomen of free flap</b>                                                                                                                                         |
| <b>1TQ58LAXXF</b> | <b>Procurement, muscles of the forearm [around elbow] free flap using open approach</b>                                                                                                                   |
| <b>1TS80LAXXE</b> | <b>Repair, tendons of the forearm [around elbow] using apposition technique [e.g. tendon sutured to tendon] with tendon transfer for realignment, [e.g. advancement, transposition]</b>                   |
| <b>1TV58LAXXK</b> | <b>Procurement, radius and ulna of bone graft (from deceased donor) using open approach</b>                                                                                                               |
| <b>1TV80LANWK</b> | <b>Repair, radius and ulna with bone homograft using plate, screw</b>                                                                                                                                     |
| <b>1UB75LANWA</b> | <b>Fusion, wrist joint with bone autograft using plate, screw</b>                                                                                                                                         |
| <b>1UB80LAXXE</b> | <b>Repair, wrist joint open approach using local tendon transfer [rebalancing]</b>                                                                                                                        |
| <b>1UC75LANW</b>  | <b>Fusion, distal radioulnar joint and carpal joints and bones fixation device [alone] using plate, screw</b>                                                                                             |
| <b>1UH74HANV</b>  | <b>Fixation, first metacarpophalangeal joint percutaneous approach [closed], fixation device alone using pin, nail</b>                                                                                    |
| <b>1UI55LAKD</b>  | <b>Removal of device, first phalanx of hand of wire/staple using open approach</b>                                                                                                                        |
| <b>1UK80LANV</b>  | <b>Repair, other interphalangeal joints of hand joint repair alone no tissue used (for repair) using pin, nail</b>                                                                                        |
| <b>1UV80WUNW</b>  | <b>Repair, tendons of wrist and hand using tenodesis with screw fixation [tendon with a bone plug fixed to bone with screw] simple repair (without graft or transfer involved)</b>                        |
| <b>1TS58LAXXA</b> | <b>Procurement, tendons of the forearm [around elbow] of tendon autograft using open approach</b>                                                                                                         |
| <b>1TS80WUXXE</b> | <b>Repair, tendons of the forearm [around elbow] using tenodesis technique [e.g. tendon looped or sutured to or through bone] with tendon transfer for realignment, [e.g. advancement, transposition]</b> |
| <b>1TV80LANWN</b> | <b>Repair, radius and ulna with synthetic tissue [e.g. bone cement, paste] using plate, screw</b>                                                                                                         |
| <b>1TV83LAXXA</b> | <b>Transfer, radius and ulna using open approach and bone autograft</b>                                                                                                                                   |
| <b>1TV87LANW</b>  | <b>Excision partial, radius and ulna no tissue used (for closure of defect) using screw, plate and screw</b>                                                                                              |
| <b>1TV93LA</b>    | <b>Amputation, radius and ulna using simple apposition technique [e.g. suturing] (for closure of stump)</b>                                                                                               |
| <b>1TX56JA</b>    | <b>Removal of foreign body, soft tissue of arm NEC using external approach (for simple extraction)</b>                                                                                                    |
| <b>1UF56LA</b>    | <b>Removal of foreign body, other metacarpal bones using open approach</b>                                                                                                                                |
| <b>1UF74LALQ</b>  | <b>Fixation, other metacarpal bones open approach fixation device alone using intramedullary nail</b>                                                                                                     |
| <b>1UG74LAKDA</b> | <b>Fixation, other metacarpophalangeal joint(s) open approach, with bone autograft using wire, staple, tension band</b>                                                                                   |
| <b>1UG80LANV</b>  | <b>Repair, other metacarpophalangeal joint(s) joint repair alone no tissue used (for repair) using pin, nail</b>                                                                                          |
| <b>1UG93LAXXA</b> | <b>Amputation, other metacarpophalangeal joint(s) using skin graft (for closure of stump)</b>                                                                                                             |

|            |                                                                                                                                                                                                |
|------------|------------------------------------------------------------------------------------------------------------------------------------------------------------------------------------------------|
| 1UI93LAXXG | Amputation, first phalanx of hand using pedicled transposition flap [e.g. finger rotation flap]                                                                                                |
| 1UJ74HALQ  | Fixation, other phalanx of hand percutaneous approach [e.g. with closed or no reduction] fixation device alone using intramedullary nail                                                       |
| 1UJ74HANW  | Fixation, other phalanx of hand percutaneous approach [e.g. with closed or no reduction] fixation device alone using plate, screw                                                              |
| 1UK55LANW  | Removal of device, other interphalangeal joints of hand of screw using open approach                                                                                                           |
| 1UT80WUXXA | Repair, flexor tendons of finger [excludes thumb] using tenodesis technique [tendon looped or sutured to or through bone] with autograft [e.g. tendon, fascia]                                 |
| 1UT80WUXXN | Repair, flexor tendons of finger [excludes thumb] using tenodesis technique [tendon looped or sutured to or through bone] with synthetic tissue [e.g. gortex, mesh]                            |
| 1TS80LAXXA | Repair, tendons of the forearm [around elbow] using apposition technique [e.g. tendon sutured to tendon] with autograft [e.g. tendon, fascia]                                                  |
| 1UB74HAKDN | Fixation, wrist joint using percutaneous approach [e.g. with closed reduction or no reduction] using wire, mesh, staple with synthetic tissue [e.g. bone cement or paste]                      |
| 1UC55LANW  | Removal of device, distal radioulnar joint and carpal joints and bones of plate/screw using open approach                                                                                      |
| 1UC74LAKDN | Fixation, distal radioulnar joint and carpal joints and bones open approach with synthetic tissue [bone cement, paste] using wire, staple                                                      |
| 1UC75LANWA | Fusion, distal radioulnar joint and carpal joints and bones with bone autograft using plate, screw                                                                                             |
| 1UF74HANW  | Fixation, other metacarpal bones percutaneous approach [e.g. with closed or no reduction] fixation device alone using plate, screw                                                             |
| 1UI74LAKDA | Fixation, first phalanx of hand open approach with bone autograft using wire, staple, tension band                                                                                             |
| 1UJ87LAXXQ | Excision partial, other phalanx of hand using open excisional approach and combined sources of tissue                                                                                          |
| 1UK80LANWA | Repair, other interphalangeal joints of hand joint repair alone with autograft [e.g. bone, interpositional tendon, fascia] using screw, plate and screw                                        |
| 1UU80LAXXN | Repair, tendons of thumb [Pollicis tendons] using apposition technique [e.g. tendon sutured to tendon] with synthetic tissue [e.g. gortex, mesh]                                               |
| 1VA80LA    | Repair, hip joint open approach using simple apposition technique only [e.g. suturing]                                                                                                         |
| 1YT56JA    | Removal of foreign body, skin of arm using external approach [for simple extraction]                                                                                                           |
| 1TV80LAXXN | Repair, radius and ulna with synthetic tissue [e.g. bone cement, paste] No device used (for repair)                                                                                            |
| 1UB74LANVN | Fixation, wrist joint open approach with synthetic tissue [e.g. bone cement, or paste] using pin, nail                                                                                         |
| 1UC74LANVA | Fixation, distal radioulnar joint and carpal joints and bones open approach with bone autograft using pin, nail                                                                                |
| 1UC80LANWA | Repair, distal radioulnar joint and carpal joints and bones open approach with screw/plate device using autograft [e.g. bone, interpositional fascia lata, tendon graft, rolled anchovy graft] |
| 1UE73LA    | Reduction, first metacarpal bone using open approach                                                                                                                                           |

|            |                                                                                                                                                                                         |
|------------|-----------------------------------------------------------------------------------------------------------------------------------------------------------------------------------------|
| 1UG53LAPN  | Implantation of internal device, other metacarpophalangeal joint(s) of uncemented dual-component prosthetic device using open approach                                                  |
| 1UH80LANW  | Repair, first metacarpophalangeal joint, joint repair alone no tissue used (for repair) using screw, plate and screw                                                                    |
| 1UI55LANV  | Removal of device, first phalanx of hand of pin/nail using open approach                                                                                                                |
| 1UT80LAXXQ | Repair, flexor tendons of finger [excludes thumb] using apposition technique [e.g. tendon sutured to tendon] with combined sources of tissue [e.g. autograft, tendon transfer, goretex] |
| 1UU80WUXXA | Repair, tendons of thumb [Pollicis tendons] using tenodesis technique [tendon looped or sutured to or through bone] with autograft [e.g. tendon, fascia]                                |
| 1UV80WUXXA | Repair, tendons of wrist and hand using tenodesis technique [tendon looped or sutured to or through bone] with autograft [e.g. tendon, fascia]                                          |
| 1TK93LA    | Amputation, humerus using simple apposition technique [e.g. suturing] (for closure of stump)                                                                                            |
| 1TS80WUXXA | Repair, tendons of the forearm [around elbow] using tenodesis technique [e.g. tendon looped or sutured to or through bone] with autograft [e.g. tendon, fascia]                         |
| 1TV74LANVK | Fixation, radius and ulna open approach with bone homograft using pin, nail                                                                                                             |
| 1TV80LANVA | Repair, radius and ulna with autograft [e.g. bone, tendon] using pin, nail                                                                                                              |
| 1UC74HANW  | Fixation, distal radioulnar joint and carpal joints and bones percutaneous approach [e.g. with closed or no reduction] fixation device alone using plate, screw                         |
| 1UC74LANWQ | Fixation, distal radioulnar joint and carpal joints and bones with combined sources of tissue [e.g. bone graft, cement/paste] using plate, screw                                        |
| 1UC79LAKD  | Repair by increasing size, distal radioulnar joint and carpal joints and bones no tissue used in lengthening [or distracting] using wire, staple                                        |
| 1UE55LAKD  | Removal of device, first metacarpal bone of wire/staple/tension band using open approach                                                                                                |
| 1UF82LANW  | Reattachment, other metacarpal bones using plate/screw fixation with apposition technique                                                                                               |
| 1UF87LAXXA | Excision partial, other metacarpal bones with bone autograft (to close defect), no device used                                                                                          |
| 1UG74LANWA | Fixation, other metacarpophalangeal joint(s) open approach with bone autograft using plate, screw                                                                                       |
| 1UJ56JA    | Removal of foreign body, other phalanx of hand using external (manual extraction) approach                                                                                              |
| 1UJ71LAXXQ | Division, other phalanx of hand division involving skin and soft tissue only (simple syndactyly) using combination of local flap and skin autograft                                     |
| 1UJ80LAXXF | Repair, other phalanx of hand using free flap [e.g. toe-to-finger flap] no device used                                                                                                  |
| 1UM80LANV  | Repair, first interphalangeal joint of hand, joint repair alone no tissue used (for repair) using pin, nail                                                                             |
| 1US80WUXXA | Repair, extensor tendons of finger [excludes thumb] using tenodesis technique [tendon looped or sutured to or through bone] with autograft [e.g. tendon, fascia]                        |
| 1BM87UHXXE | Excision partial, nerve(s) of upper arm and elbow interfascicular split repair [rejoining] technique transposition of nerves [e.g. crossover]                                           |
| 1BQ80LAW3  | Repair, nerve(s) of digit of hand using fibrin glue [rejoining] technique                                                                                                               |

|                   |                                                                                                                                                                                                           |
|-------------------|-----------------------------------------------------------------------------------------------------------------------------------------------------------------------------------------------------------|
| <b>1BQ87LAXXN</b> | <b>Excision partial, nerve(s) of digit of hand, no rejoining (of nerve ends) nerve end(s) wrapped or bridged using synthetic tissue [e.g. neural tube]</b>                                                |
| <b>1TK93LAXXE</b> | <b>Amputation, humerus using local flap [e.g. myoplasty, osteoperiosteal flap or myodesis] (for closure of stump)</b>                                                                                     |
| <b>1TQ87LAXXF</b> | <b>Excision partial, muscles of the forearm [around elbow] using free flap [e.g. myocutaneous free flap] (for closure of defect)</b>                                                                      |
| <b>1TV79LAMG</b>  | <b>Repair by increasing size, radius and ulna using circular frame distraction device [e.g. Ilizarov]</b>                                                                                                 |
| <b>1TV80LANWQ</b> | <b>Repair, radius and ulna with combined sources of tissue [e.g. bone graft, cement/paste] using plate, screw</b>                                                                                         |
| <b>1TV83LAXXN</b> | <b>Transfer, radius and ulna using open approach and synthetic tissue [e.g. bone cement, paste]</b>                                                                                                       |
| <b>1TV87LANWA</b> | <b>Excision partial, radius and ulna with bone autograft using screw, plate and screw</b>                                                                                                                 |
| <b>1TV93LAXXE</b> | <b>Amputation, radius and ulna using local flap [e.g. myoplasty, osteoperiosteal flap or myodesis] (for closure of stump)</b>                                                                             |
| <b>1UB52WJ</b>    | <b>Drainage, wrist joint using open excisional approach [e.g. bursectomy]</b>                                                                                                                             |
| <b>1UB93LA</b>    | <b>Amputation, wrist joint using simple apposition technique [e.g. suturing] (for closure of stump)</b>                                                                                                   |
| <b>1UC75LAKDA</b> | <b>Fusion, distal radioulnar joint and carpal joints and bones with bone autograft using wire, staple</b>                                                                                                 |
| <b>1UF74LAKDN</b> | <b>Fixation, other metacarpal bones open approach with synthetic tissue [e.g. bone cement or paste] using wire, staple</b>                                                                                |
| <b>1UF82LA</b>    | <b>Reattachment, other metacarpal bones using simple apposition technique [e.g. suturing]</b>                                                                                                             |
| <b>1UF87LANW</b>  | <b>Excision partial, other metacarpal bones no tissue used (for closure of defect) using plate, screw</b>                                                                                                 |
| <b>1UG80LAXXA</b> | <b>Repair, other metacarpophalangeal joint(s) joint repair alone with autograft [e.g. bone, interpositional tendon, fascia] no device used (for repair)</b>                                               |
| <b>1UG80VJ</b>    | <b>Repair, other metacarpophalangeal joint(s) joint repair with metacarpal osteotomy no tissue used (for repair) no device used (for repair)</b>                                                          |
| <b>1UH73JA</b>    | <b>Reduction, first metacarpophalangeal joint using closed (external) approach</b>                                                                                                                        |
| <b>1UJ80LAKDG</b> | <b>Repair, other phalanx of hand using pedicled transposition flap [finger rotation flap, pollicization] using wire, staple</b>                                                                           |
| <b>1UK52WJ</b>    | <b>Drainage, other interphalangeal joints of hand using open excisional approach [e.g. bursectomy]</b>                                                                                                    |
| <b>1UK80LAKDN</b> | <b>Repair, other interphalangeal joints of hand joint repair alone with synthetic tissue [e.g. silastic sheath] using wire, staple, tension band</b>                                                      |
| <b>1US80WUXXE</b> | <b>Repair, extensor tendons of finger [excludes thumb] using tenodesis technique [tendon looped or sutured to or through bone] with tendon transfer for realignment [e.g. advancement, transposition]</b> |
| <b>1BN87UH</b>    | <b>Excision partial, nerve(s) of forearm and wrist interfascicular split repair [rejoining] technique simple apposition of nerve ends</b>                                                                 |
| <b>1BN87UHXXA</b> | <b>Excision partial, nerve(s) of forearm and wrist interfascicular split repair [rejoining] technique nerve autograft (to replace lost length)</b>                                                        |
| <b>1BN87UHXXE</b> | <b>Excision partial, nerve(s) of forearm and wrist interfascicular split repair [rejoining] technique transposition of nerves [e.g. crossover]</b>                                                        |

|            |                                                                                                                                                                                  |
|------------|----------------------------------------------------------------------------------------------------------------------------------------------------------------------------------|
| 1BP87WG    | Excision partial, nerve(s) of hand no rejoining [of nerve ends] nerve end fascicles coagulated (and buried)                                                                      |
| 1BQ87LAXXE | Excision partial, nerve(s) of digit of hand end-to-end [rejoining] technique (e.g. suture, glue) transposition of nerves [e.g. crossover]                                        |
| 1JJ80LA    | Repair, brachiocephalic arteries using open approach without tissue [e.g. direct repair or end-to-end anastomosis]                                                               |
| 1TQ87LAXXE | Excision partial, muscles of the forearm [around elbow] using local transposition flap [e.g. advancement muscle or Z-plasty skin flap] (for closure of defect)                   |
| 1TS80LAXXN | Repair, tendons of the forearm [around elbow] using apposition technique [e.g. tendon sutured to tendon] with synthetic tissue [e.g. gortex, mesh]                               |
| 1TV52HA    | Drainage, radius and ulna using percutaneous (needle) approach                                                                                                                   |
| 1TV74LAKDK | Fixation, radius and ulna open approach with bone homograft using wire, mesh, staple                                                                                             |
| 1TV87LAKD  | Excision partial, radius and ulna no tissue used (for closure of defect) using wire, mesh, staple                                                                                |
| 1TV91LAPM  | Excision radical, radius and ulna no tissue used (for closure of defect) using endoprosthesis [radial or humeral head]                                                           |
| 1TX35HAP1  | Pharmacotherapy (local), soft tissue of arm NEC using percutaneous approach and local anesthetic agent                                                                           |
| 1TX87LAXXF | Excision partial, soft tissue of arm NEC using open approach and free flap [e.g. myocutaneous free flap] (to close surgical defect)                                              |
| 1UB74LAKDQ | Fixation, wrist joint open approach with combined sources of tissue [e.g. bone graft, cement/paste] using wire, mesh, staple                                                     |
| 1UB75LANW  | Fusion, wrist joint no tissue used (for fusion) using plate, screw                                                                                                               |
| 1UC75LANV  | Fusion, distal radioulnar joint and carpal joints and bones fixation device [alone] using pin, nail                                                                              |
| 1UC82LANW  | Reattachment, distal radioulnar joint and carpal joints and bones using open approach and plate/screw fixation with apposition                                                   |
| 1UC87GB    | Excision partial, distal radioulnar joint and carpal joints and bones endoscopic [arthroscopic] approach, synovectomy or ganglionectomy alone                                    |
| 1UF74HALQ  | Fixation, other metacarpal bones percutaneous approach [e.g. with closed or no reduction] fixation device alone using intramedullary nail                                        |
| 1UF74LANWN | Fixation, other metacarpal bones open approach with synthetic tissue [e.g. bone cement or paste] using plate, screw                                                              |
| 1UF84LAXXE | Construction or reconstruction, other metacarpal bones using open approach and local flap [for closure]                                                                          |
| 1UG55LANV  | Removal of device, other metacarpophalangeal joint(s) of pin/nail using open approach                                                                                            |
| 1UG75LANW  | Fusion, other metacarpophalangeal joint(s) joint fusion alone no tissue used (for fusion) using screw, plate and screw                                                           |
| 1UH80LANV  | Repair, first metacarpophalangeal joint, joint repair alone no tissue used (for repair) using pin, nail                                                                          |
| 1UI03HAKC  | Immobilization, first phalanx of hand using percutaneous external fixator                                                                                                        |
| 1UV80WUXXE | Repair, tendons of wrist and hand using tenodesis technique [tendon looped or sutured to or through bone] with tendon transfer for realignment [e.g. advancement, transposition] |
| 1UY87LAXXQ | Excision partial, soft tissue of the wrist and hand using open approach and combined sources of tissue [e.g. skin graft with flap] (for closure of defect)                       |

|            |                                                                                                                                                                                                                   |
|------------|-------------------------------------------------------------------------------------------------------------------------------------------------------------------------------------------------------------------|
| 1TQ80LAXXF | Repair, muscles of the forearm [around elbow] using open approach and free flap                                                                                                                                   |
| 1TS80WUNWE | Repair, tendons of the forearm [around elbow] using tenodesis with screw fixation [e.g. tendon with a bone plug fixed to bone with screw] with tendon transfer for realignment, [e.g. advancement, transposition] |
| 1TV80LAKDA | Repair, radius and ulna with autograft [e.g. bone, tendon] using wire, mesh, staple                                                                                                                               |
| 1TV80LAKDN | Repair, radius and ulna with synthetic tissue [e.g. bone cement, paste] using wire, mesh, staple                                                                                                                  |
| 1TZ70LA    | Incision NOS, arm NEC using open approach                                                                                                                                                                         |
| 1UB74HALQ  | Fixation, wrist joint percutaneous approach (e.g. with closed or no reduction) fixation device alone using intramedullary nail                                                                                    |
| 1UB74LAKDK | Fixation, wrist joint open approach with bone homograft using wire, mesh, staple                                                                                                                                  |
| 1UC57LA    | Extraction, distal radioulnar joint and carpal joints and bones using open approach                                                                                                                               |
| 1UC79LANW  | Repair by increasing size, distal radioulnar joint and carpal joints and bones no tissue used in lengthening [or distracting] using plate, screw                                                                  |
| 1UC82LAKD  | Reattachment, distal radioulnar joint and carpal joints and bones using open approach and wire/staple fixation with apposition                                                                                    |
| 1UE55HAKD  | Removal of device, first metacarpal bone of wire/staple/tension band using percutaneous approach                                                                                                                  |
| 1UF80LAKDA | Repair, other metacarpal bones with bone autograft using wire, staple                                                                                                                                             |
| 1UF80LANWA | Repair, other metacarpal bones with bone autograft using plate, screw                                                                                                                                             |
| 1UF87LAKD  | Excision partial, other metacarpal bones no tissue used (for closure of defect) using wire, staple                                                                                                                |
| 1UF87LAXXN | Excision partial, other metacarpal bones with synthetic tissue [e.g. bone cement, or paste], no device used                                                                                                       |
| 1UG57LA    | Extraction, metacarpophalangeal joint(s) using open approach                                                                                                                                                      |
| 1UG80LAKDA | Repair, other metacarpophalangeal joint(s) joint repair alone with autograft [e.g. bone, interpositional tendon, fascia] using wire, staple, tension band                                                         |
| 1UG80VJKD  | Repair, other metacarpophalangeal joint(s) joint repair with metacarpal osteotomy no tissue used (for repair) using wire, staple, tension band                                                                    |
| 1UI55HAKD  | Removal of device, first phalanx of hand of wire/staple using percutaneous approach                                                                                                                               |
| 1UI87LAXXA | Excision partial, first phalanx of hand using open approach and autograft                                                                                                                                         |
| 1UJ74LANVA | Fixation, other phalanx of hand open approach with bone autograft using pin, nail                                                                                                                                 |
| 1UK75HAKD  | Fusion, other interphalangeal joints of hand percutaneous approach using wire, tension band                                                                                                                       |
| 1UK80VJNW  | Repair, other interphalangeal joints of hand joint repair with phalangeal osteotomy (for realigning joint) no tissue used (for repair) using screw, plate and screw                                               |
| 1UM80LANW  | Repair, first interphalangeal joint of hand, joint repair alone no tissue used (for repair) using screw, plate and screw                                                                                          |
| 1UT55LASL  | Removal of device, flexor tendons of finger [excludes thumb] of spacer device [e.g. Silastic rod] using open approach                                                                                             |
| 1YT87LAXXA | Excision partial, skin of arm open [excisional] approach using full                                                                                                                                               |

|            |                                                                                                                                                                                               |
|------------|-----------------------------------------------------------------------------------------------------------------------------------------------------------------------------------------------|
|            | thickness autograft                                                                                                                                                                           |
| 1TM93LA    | Amputation, elbow joint using simple apposition technique [e.g. suturing] (for closure of stump)                                                                                              |
| 1TS80WUNWN | Repair, tendons of the forearm [around elbow] using tenodesis with screw fixation [e.g. tendon with a bone plug fixed to bone with screw] with synthetic tissue [e.g. gortex, mesh]           |
| 1TS80WUXXN | Repair, tendons of the forearm [around elbow] using tenodesis technique [e.g. tendon looped or sutured to or through bone] with synthetic tissue [e.g. gortex, mesh]                          |
| 1TV82LANWA | Reattachment, radius and ulna using open approach and plate/screw fixation with bone autograft                                                                                                |
| 1TV87LANWN | Excision partial, radius and ulna with synthetic tissue [e.g. bone cement or paste] using screw, plate and screw                                                                              |
| 1TV93LAXXA | Amputation, radius and ulna using skin graft (for closure of stump)                                                                                                                           |
| 1UB53LAPMN | Implantation of internal device, wrist joint with synthetic material (e.g. bone paste, cement, Dynagraft, Osteoset) using single-component prosthetic device [e.g. styloid process of radius] |
| 1UB57LA    | Extraction, wrist joint using open approach                                                                                                                                                   |
| 1UB74LALQ  | Fixation, wrist joint open approach fixation device alone using intramedullary nail                                                                                                           |
| 1UB80LAXXN | Repair, wrist joint open approach using synthetic tissue [e.g. mesh, gortex, silastic sheath]                                                                                                 |
| 1UB93LAXXE | Amputation, wrist joint using local flap myoplasty or myodesis (for closure of stump)                                                                                                         |
| 1UC53LAPM  | Implantation of internal device, distal radioulnar joint and carpal joints and bones of single-component prosthetic device using open approach                                                |
| 1UC53LAQD  | Implantation of internal device, distal radioulnar joint and carpal joints and bones of single component prosthetic device with (additional) wire fixation using open approach                |
| 1UC74LAKDQ | Fixation, distal radioulnar joint and carpal joints and bones open approach with combined sources of tissue [e.g. bone graft, cement/paste] using wire, staple                                |
| 1UC74LANVN | Fixation, distal radioulnar joint and carpal joints and bones open approach with synthetic tissue [bone cement, paste] using pin, nail                                                        |
| 1UC80LAXXQ | Repair, distal radioulnar joint and carpal joints and bones open approach using combined sources of tissue [autograft with synthetic tissue]                                                  |
| 1UE87LA    | Excision partial, first metacarpal bone no tissue used (for repair) no device used                                                                                                            |
| 1UF74LANVA | Fixation, other metacarpal bones open approach with bone autograft using pin, nail                                                                                                            |
| 1UF80LANV  | Repair, other metacarpal bones no tissue used (for repair) using pin, nail                                                                                                                    |
| 1UG55LANW  | Removal of device, other metacarpophalangeal joint(s) of screw/plate using open approach                                                                                                      |
| 1UH72LA    | Release, first metacarpophalangeal joint using open (incisional) approach                                                                                                                     |
| 1UH75LANW  | Fusion, first metacarpophalangeal joint, joint fusion alone no tissue used (for fusion) using screw, plate and screw                                                                          |
| 1UH87LA    | Excision partial, first metacarpophalangeal joint using other excisional technique [e.g. arthroectomy, chondrectomy] (with or without synovectomy)                                            |

|            |                                                                                                                                                                                                        |
|------------|--------------------------------------------------------------------------------------------------------------------------------------------------------------------------------------------------------|
| 1UH93LA    | Amputation, first metacarpophalangeal joint using simple apposition technique [e.g. suturing] (for closure of stump)                                                                                   |
| 1UI74LANWA | Fixation, first phalanx of hand open approach with bone autograft using plate, screw                                                                                                                   |
| 1UI80LAXXA | Repair, first phalanx of hand using autograft [e.g. bone peg] no device used                                                                                                                           |
| 1UI80LAXXG | Repair, first phalanx of hand using pedicled transposition flap [finger rotation flap, pollicization] no device used                                                                                   |
| 1UI93LAXXF | Amputation, first phalanx of hand using free flap [e.g. toe-to-finger flap]                                                                                                                            |
| 1UJ74LANVN | Fixation, other phalanx of hand open approach with synthetic tissue [bone cement, paste] using pin, nail                                                                                               |
| 1UK52WKTS  | Drainage, other interphalangeal joints of hand using open incisional approach [e.g. bursotomy] and leaving drainage tube [catheter] in situ                                                            |
| 1UK80VJKDA | Repair, other interphalangeal joints of hand joint repair with phalangeal osteotomy (for realigning joint) with autograft [e.g. bone, interpositional tendon, fascia] using wire, staple, tension band |
| 1UM72LA    | Release, first interphalangeal joint of hand using open (incisional) approach                                                                                                                          |
| 1UM75LANW  | Fusion, first interphalangeal joint of hand open approach using screw                                                                                                                                  |
| 1US80WUXXN | Repair, extensor tendons of finger [excludes thumb] using tenodesis technique [tendon looped or sutured to or through bone] with synthetic tissue [e.g. gortex, mesh]                                  |
| 1UU80WUXXN | Repair, tendons of thumb [Pollicis tendons] using tenodesis technique [tendon looped or sutured to or through bone] with synthetic tissue [e.g. gortex, mesh]                                          |
| 1BN80LAW3  | Repair, nerve(s) of forearm and wrist using fibrin glue [rejoining] technique                                                                                                                          |
| 1BN87LAXXN | Excision partial, nerve(s) of forearm and wrist, no rejoining [of nerve ends] nerve end(s) wrapped or bridged using synthetic tissue [e.g. neural tube]                                                |
| 1BP87LAXXN | Excision partial, nerve(s) of hand, no rejoining (of nerve ends), nerve end(s) wrapped or bridged using synthetic tissue [e.g. neural tube]                                                            |
| 1BQ87UH    | Excision partial, nerve(s) of digit of hand interfascicular split repair [rejoining] technique simple apposition of nerve ends                                                                         |
| 1BQ87WG    | Excision partial, nerve(s) of digit of hand no rejoining[of nerve ends] nerve end fascicles coagulated (and buried)                                                                                    |
| 1JM50GQBD  | Dilation, arteries of arm NEC using percutaneous transluminal approach and balloon dilator                                                                                                             |
| 1JM51LAW3  | Occlusion, arteries of arm NEC using open approach and fibrin glue                                                                                                                                     |
| 1TK93LAXXA | Amputation, humerus using skin graft (for closure of stump)                                                                                                                                            |
| 1TS80WUNWA | Repair, tendons of the forearm [around elbow] using tenodesis with screw fixation [e.g. tendon with a bone plug fixed to bone with screw] with autograft [e.g. tendon, fascia]                         |
| 1TV58LAXXG | Procurement, radius and ulna of pedicled flap using open approach                                                                                                                                      |
| 1TV80LAKDK | Repair, radius and ulna with bone homograft using wire, mesh, staple                                                                                                                                   |
| 1TV87LAPMN | Excision partial, radius and ulna with synthetic tissue [e.g. bone cement or paste] using endoprosthesis [radial or humeral head]                                                                      |
| 1TX35HAL7  | Pharmacotherapy (local), soft tissue of arm NEC using percutaneous approach and bacterial toxin (e.g. botulinum toxin or Botox)                                                                        |
| 1UB04JH    | Mobilization, wrist joint using external approach with manual technique                                                                                                                                |

|            |                                                                                                                                                                      |
|------------|----------------------------------------------------------------------------------------------------------------------------------------------------------------------|
| 1UB35HAP2  | Pharmacotherapy (local), wrist joint using percutaneous (needle) approach and analgesic agent                                                                        |
| 1UB75LANV  | Fusion, wrist joint no tissue used (for fusion) using pin, nail                                                                                                      |
| 1UB75LANVA | Fusion, wrist joint with bone autograft using pin, nail                                                                                                              |
| 1UC80LAXXG | Repair, distal radioulnar joint and carpal joints and bones open approach using pedicled flap [e.g. radial bone with vascular pedicle]                               |
| 1UE56LA    | Removal of foreign body, first metacarpal bone using open approach                                                                                                   |
| 1UE74LANWA | Fixation, first metacarpal bones open approach with bone autograft using plate, screw                                                                                |
| 1UE80LAKD  | Repair first metacarpal bone, no tissue used (for repair) using wire, staple                                                                                         |
| 1UE93LAXXE | Amputation, first metacarpal bone using local flap [e.g. myoplasty or myodesis] (for closure of stump)                                                               |
| 1UF74LAKDK | Fixation, other metacarpal bones open approach with bone homograft using wire, staple                                                                                |
| 1UF80LAXXA | Repair, other metacarpal bones with bone autograft no device used                                                                                                    |
| 1UF84LAXXQ | Construction or reconstruction, other metacarpal bones using open approach and local flap with skin autograft [for closure]                                          |
| 1UG52HA    | Drainage, other metacarpophalangeal joint(s) using percutaneous (needle) aspiration                                                                                  |
| 1UG52WJ    | Drainage, other metacarpophalangeal joint(s) using open excisional approach [e.g. bursectomy]                                                                        |
| 1UG72JA    | Release, metacarpophalangeal joint(s) using manual technique                                                                                                         |
| 1UG75VJNW  | Fusion, other metacarpophalangeal joint(s) joint fusion with metacarpal osteotomy no tissue used (for fusion) using screw, plate and screw                           |
| 1UG80VJNW  | Repair, other metacarpophalangeal joint(s) joint repair with metacarpal osteotomy no tissue used (for repair) using screw, plate and screw                           |
| 1UH75LAKD  | Fusion, first metacarpophalangeal joint, joint fusion alone no tissue used (for fusion) using wire, staple, tension band                                             |
| 1UH80LAXXN | Repair, first metacarpophalangeal joint, joint repair alone with synthetic tissue [e.g. silastic sheath] no device used (for repair)                                 |
| 1UH80VJ    | Repair, first metacarpophalangeal joint, joint repair with metacarpal osteotomy no tissue used (for repair) no device used (for repair)                              |
| 1UI74LAKDN | Fixation, first phalanx of hand open approach with synthetic tissue [bone, cement, paste] using wire, staple, tension band                                           |
| 1UI74LALQ  | Fixation, first phalanx of hand open approach fixation device alone using intramedullary nail                                                                        |
| 1UI74LANWN | Fixation, first phalanx of hand open approach with synthetic tissue [bone, cement, paste] using plate, screw                                                         |
| 1UI87LAXXQ | Excision partial, first phalanx of hand using open approach and combined sources of tissue                                                                           |
| 1UI93LAXXB | Amputation, first phalanx of hand using split-thickness skin graft (for closure of stump)                                                                            |
| 1UK55LAPM  | Removal of device, other interphalangeal joints of hand of uncemented single-component prosthetic device using open approach                                         |
| 1UK80LAKDQ | Repair, other interphalangeal joints of hand joint repair alone with combined sources of tissue [e.g. bone graft, synthetic tissue] using wire, staple, tension band |

|            |                                                                                                                                                                                                                       |
|------------|-----------------------------------------------------------------------------------------------------------------------------------------------------------------------------------------------------------------------|
| 1UM80LAKDA | Repair, first interphalangeal joint of hand, joint repair alone with autograft [e.g. bone, interpositional tendon, fascia] using wire, staple, tension band                                                           |
| 1US53LASL  | Implantation of internal device, extensor tendons of finger [excludes thumb] using open approach and spacer device [e.g. Silastic rod]                                                                                |
| 1US80WUNWE | Repair, extensor tendons of finger [excludes thumb] using tenodesis with screw fixation [tendon with a bone plug fixed to bone with screw] with tendon transfer for realignment [e.g. advancement, transposition]     |
| 1US80WUNWQ | Repair, extensor tendons of finger [excludes thumb] using tenodesis with screw fixation [tendon with a bone plug fixed to bone with screw] with combined sources of tissue [e.g. autograft, tendon transfer, goretex] |
| 1US80WUXXQ | Repair, extensor tendons of finger [excludes thumb] using tenodesis technique [tendon looped or sutured to or through bone] with combined sources of tissue [e.g. autograft, tendon transfer, goretex]                |
| 1UT80WUNWE | Repair, flexor tendons of finger [excludes thumb] using tenodesis with screw fixation [tendon with a bone plug fixed to bone with screw] with tendon transfer for realignment [e.g. advancement, transposition]       |
| 1UT80WUXXQ | Repair, flexor tendons of finger [excludes thumb] using tenodesis technique [tendon looped or sutured to or through bone] with combined sources of tissue [e.g. autograft, tendon transfer, goretex]                  |
| 1UU80WUNWE | Repair, tendons of thumb [Pollicis tendons] using tenodesis with screw fixation [tendon with a bone plug fixed to bone with screw] with tendon transfer for realignment [e.g. advancement, transposition]             |
| 1UV80WUNWE | Repair, tendons of wrist and hand using tenodesis with screw fixation [tendon with a bone plug fixed to bone with screw] with tendon transfer for realignment [e.g. advancement, transposition]                       |
| 1UV80WUXXQ | Repair, tendons of wrist and hand using tenodesis technique [tendon looped or sutured to or through bone] with combined sources of tissue [e.g. autograft, tendon transfer, goretex]                                  |
| 1YT80LAXXG | Repair, skin of arm using pedicled (distant)flap                                                                                                                                                                      |
| 1YX80LAW4  | Repair, nail using open approach and glue (e.g. crazy glue, glustitch)                                                                                                                                                |
| 1YX80LAXXB | Repair, nail using open approach and split-thickness autograft                                                                                                                                                        |
| 1YX89LAXXA | Excision total, nail using open [excisional] approach and full-thickness autograft                                                                                                                                    |
| 2BG70LL    | Inspection, brachial plexus using anterior open approach                                                                                                                                                              |
| 1TM93LAXXE | Amputation, elbow joint using local flap myoplasty or myodesis (for closure of stump)                                                                                                                                 |
| 1TS58LAXXF | Procurement, tendons of the forearm [around elbow] of free flap (innervated with artery pedicle)                                                                                                                      |
| 1TV52HAJ2  | Drainage, radius and ulna using percutaneous (needle) approach and steroid infiltration                                                                                                                               |
| 1TV55LAPM  | Removal of device, radius and ulna of endoprosthesis using open approach                                                                                                                                              |
| 1TV80LANVN | Repair, radius and ulna with synthetic tissue [e.g. bone cement, paste] using pin, nail                                                                                                                               |
| 1TV83LAXXQ | Transfer, radius and ulna using open approach and combined sources of tissue [e.g. bone graft and cement/paste]                                                                                                       |
| 1TV87LAPMK | Excision partial, radius and ulna with bone homograft [e.g. from bone bank] using endoprosthesis [radial or humeral head]                                                                                             |

|            |                                                                                                                                                                                                   |
|------------|---------------------------------------------------------------------------------------------------------------------------------------------------------------------------------------------------|
| 1TV91LAPMN | Excision radical, radius and ulna with synthetic tissue [e.g. bone cement or paste] using endoprosthesis [radial or humeral head]                                                                 |
| 1UB53LAPNA | Implantation of internal device, wrist joint with bone autograft [uncemented] dual-component prosthetic device [e.g. proximal radius and ulnar head with or without scaphoid or lunate component] |
| 1UB55LAPM  | Removal of device, wrist joint of uncemented single component prosthetic device using open approach                                                                                               |
| 1UB74LANVQ | Fixation, wrist joint open approach with combined sources of tissue [e.g. bone graft, cement/paste] using pin, nail                                                                               |
| 1UB75LANWQ | Fusion, wrist joint with combined sources of tissue [e.g. bone graft, cement/paste] using plate, screw                                                                                            |
| 1UB80DAXXA | Repair, wrist joint endoscopic [arthroscopic] approach using autograft [e.g. bone, interpositional fascia lata, muscle graft, rolled òanchovyö graft]                                             |
| 1UB80LAXXQ | Repair, wrist joint open approach using combined sources of tissue [autograft with synthetic tissue]                                                                                              |
| 1UC55LAPM  | Removal of device, distal radioulnar joint and carpal joints and bones of single- component prosthetic device                                                                                     |
| 1UC80DAXXA | Repair, distal radioulnar joint and carpal joints and bones endoscopic [arthroscopic] approach using autograft [e.g. bone, interpositional fascia lata, tendon graft, rolled 'anchovy' graft]     |
| 1UC82LA    | Reattachment, distal radioulnar joint and carpal joints and bones using open approach and apposition [suturing]                                                                                   |
| 1UC82LAXXF | Reattachment, distal radioulnar joint and carpal joints and bones using open approach and free flap [e.g. myocutaneous, osseocutaneous flap]                                                      |
| 1UE74LAKDA | Fixation, first metacarpal bones open approach with bone autograft using wire, staple                                                                                                             |
| 1UE80LANV  | Repair first metacarpal bone, no tissue used (for repair) using pin, nail                                                                                                                         |
| 1UE80LANW  | Repair first metacarpal bone, no tissue used (for repair) using plate, screw                                                                                                                      |
| 1UE82LA    | Reattachment, first metacarpal bone using simple apposition technique [e.g. suturing]                                                                                                             |
| 1UE82LANW  | Reattachment, first metacarpal bone using plate/screw fixation with apposition technique                                                                                                          |
| 1UE82LAXXF | Reattachment, first metacarpal bone using free flap [e.g. myocutaneous, osseocutaneous flap]                                                                                                      |
| 1UE93LA    | Amputation, first metacarpal bone using simple apposition technique [e.g. suturing] (for closure of stump)                                                                                        |
| 1UF74LAKDQ | Fixation, other metacarpal bones open approach with combined bone graft and cement, paste using wire, staple                                                                                      |
| 1UF74LANVN | Fixation, other metacarpal bones open approach with synthetic tissue [e.g. bone cement or paste] using pin, nail                                                                                  |
| 1UF74LANWK | Fixation, other metacarpal bones open approach with bone homograft using plate, screw                                                                                                             |
| 1UF74LANWQ | Fixation, other metacarpal bones open approach with combined sources of tissue [e.g. graft & cement/paste] using plate, screw                                                                     |
| 1UF79HAMG  | Repair by increasing size, other metacarpal bones using distraction device [e.g. Ilizarov circular frame]                                                                                         |
| 1UF80LAXXN | Repair, other metacarpal bones with synthetic tissue [e.g. bone cement, or paste] no device used                                                                                                  |

|            |                                                                                                                                                                                                    |
|------------|----------------------------------------------------------------------------------------------------------------------------------------------------------------------------------------------------|
| 1UF87LANWK | Excision partial, other metacarpal bones with bone homograft (to close defect) using plate, screw                                                                                                  |
| 1UF87LAXXK | Excision partial, other metacarpal bones with bone homograft (to close defect), no device used                                                                                                     |
| 1UF87LAXXQ | Excision partial, other metacarpal bones with combined sources of tissue [e.g. bone graft, cement/paste], no device used                                                                           |
| 1UG74HANW  | Fixation, other metacarpophalangeal joint(s) percutaneous approach [e.g. with closed or no reduction] fixation device alone using plate, screw                                                     |
| 1UG80LAKDN | Repair, other metacarpophalangeal joint(s) joint repair alone with synthetic tissue [e.g. silastic sheath] using wire, staple, tension band                                                        |
| 1UH53LAPN  | Implantation of internal device, first metacarpophalangeal joint of uncemented dual-component prosthetic device using open approach                                                                |
| 1UH55LANV  | Removal of device, first metacarpophalangeal joint of pin, nail using open approach                                                                                                                |
| 1UH74LALQ  | Fixation, first metacarpophalangeal joint, open approach, fixation device alone using intramedullary nail                                                                                          |
| 1UH75VJKD  | Fusion, first metacarpophalangeal joint, joint fusion with metacarpal osteotomy no tissue used (for fusion) using wire, staple, tension band                                                       |
| 1UH75VJNWA | Fusion, first metacarpophalangeal joint, joint fusion with metacarpal osteotomy with bone autograft using screw, plate and screw                                                                   |
| 1UH80LAKDA | Repair, first metacarpophalangeal joint, joint repair alone with autograft [e.g. bone, interpositional tendon, fascia] using wire, staple, tension band                                            |
| 1UH93LAXXE | Amputation, first metacarpophalangeal joint using local flap myoplasty or myodesis (for closure of stump)                                                                                          |
| 1UI74HALQ  | Fixation, first phalanx of hand percutaneous approach [e.g. with closed or no reduction] fixation device alone using intramedullary nail                                                           |
| 1UI80LANWA | Repair, first phalanx of hand using autograft<br>[e.g. bone peg] using plate, screw                                                                                                                |
| 1UI80LAXXF | Repair, first phalanx of hand using free flap [e.g. toe to finger flap] no device used                                                                                                             |
| 1UJ74LAKDQ | Fixation, other phalanx of hand open approach with combined sources of tissue [e.g. bone graft, cement/paste] using wire, staple, tension band                                                     |
| 1UJ75LAKDE | Fusion, other phalanx of hand using wire with local transposition flap (to join fingers together)                                                                                                  |
| 1UJ75LAKDQ | Fusion, other phalanx hand using wire with combined sources of tissue [e.g. local transposition flap and skin autograft]                                                                           |
| 1UJ87UR    | Excision partial, other phalanx of hand using ligature dissection technique                                                                                                                        |
| 1UK52HA    | Drainage, other interphalangeal joints of hand using percutaneous (needle) aspiration                                                                                                              |
| 1UK80LAKDK | Repair, other interphalangeal joints of hand joint repair alone with bone homograft using wire, staple, tension band                                                                               |
| 1UK80LANVA | Repair, other interphalangeal joints of hand joint repair alone with autograft [e.g. bone, interpositional tendon, fascia] using pin, nail                                                         |
| 1UK80LANWK | Repair, other interphalangeal joints of hand joint repair alone with bone homograft using screw, plate and screw                                                                                   |
| 1UK80VJNWA | Repair, other interphalangeal joints of hand joint repair with phalangeal osteotomy (for realigning joint) with autograft [e.g. bone, interpositional tendon, fascia] using screw, plate and screw |

|                   |                                                                                                                                                                                                               |
|-------------------|---------------------------------------------------------------------------------------------------------------------------------------------------------------------------------------------------------------|
| <b>1UM52WJ</b>    | <b>Drainage, first interphalangeal joint of hand using open excisional approach [e.g. bursectomy]</b>                                                                                                         |
| <b>1UM52WK</b>    | <b>Drainage, first interphalangeal joint of hand using open incisional approach [e.g. bursotomy]</b>                                                                                                          |
| <b>1UM74HANW</b>  | <b>Fixation, first interphalangeal joint of hand using percutaneous (closed) approach and plate/screw</b>                                                                                                     |
| <b>1UM80LANVA</b> | <b>Repair, first interphalangeal joint of hand, joint repair alone with autograft [e.g. bone interpositional tendon, fascia] using pin, nail</b>                                                              |
| <b>1UM80LAXXA</b> | <b>Repair, first interphalangeal joint of hand, joint repair alone with autograft [e.g. bone interpositional tendon, fascia] no device used (for repair)</b>                                                  |
| <b>1UM80VJKD</b>  | <b>Repair, first interphalangeal joint of hand, joint repair with phalangeal osteotomy (for realigning joint) no tissue used (for repair) using wire, staple, tension band</b>                                |
| <b>1UM80VJKDA</b> | <b>Repair, first interphalangeal joint of hand, joint repair with phalangeal osteotomy (for realigning joint) with autograft [e.g. bone, interpositional tendon, fascia] using wire, staple, tension band</b> |
| <b>1UM80VJNWA</b> | <b>Repair, first interphalangeal joint of hand, joint repair with phalangeal osteotomy (for realigning joint) with autograft [e.g. bone, interpositional tendon, fascia] using screw, plate and screw</b>     |
| <b>1US80WUNWA</b> | <b>Repair, extensor tendons of finger [excludes thumb] using tenodesis with screw fixation [tendon with a bone plug fixed to bone with screw] with autograft [e.g. tendon, fascia]</b>                        |
| <b>1US80WUNWN</b> | <b>Repair, extensor tendons of finger [excludes thumb] using tenodesis with screw fixation [tendon with a bone plug fixed to bone with screw] with synthetic tissue [e.g. gortex, mesh]</b>                   |
| <b>1UT80WUNWN</b> | <b>Repair, flexor tendons of finger [excludes thumb] using tenodesis with screw fixation [tendon with a bone plug fixed to bone with screw] with synthetic tissue [e.g. gortex, mesh]</b>                     |
| <b>1UV80LAXXN</b> | <b>Repair, tendons of wrist and hand using apposition technique [e.g. tendon sutured to tendon] with synthetic tissue [e.g. gortex, mesh]</b>                                                                 |
| <b>1UV80LAXXQ</b> | <b>Repair, tendons of wrist and hand using apposition technique [e.g. tendon sutured to tendon] with combined sources of tissue [e.g. autograft, tendon transfer, goretex]</b>                                |
| <b>1UY80LAXXN</b> | <b>Repair, soft tissue of the wrist and hand using open approach and synthetic tissue [e.g. gortex, mesh or Silastic sheath]</b>                                                                              |
| <b>1BF80LA</b>    | <b>Repair, sympathetic nerves using end to end [whole] nerve suture technique</b>                                                                                                                             |
| <b>1BM80LAW3</b>  | <b>Repair, nerve(s) of upper arm and elbow using fibrin glue [rejoining] technique</b>                                                                                                                        |
| <b>1BM87UH</b>    | <b>Excision partial, nerve(s) of upper arm and elbow interfascicular split repair [rejoining] technique simple apposition of nerve ends</b>                                                                   |
| <b>1BP87LAXXE</b> | <b>Excision partial, nerve(s) of hand end to end suture [rejoining] technique transposition of nerves [e.g. crossover]</b>                                                                                    |
| <b>1BP87UHXXE</b> | <b>Excision partial, nerve(s) of hand interfascicular split repair [rejoining] technique transposition of nerves [e.g. crossover]</b>                                                                         |
| <b>1BQ87UHXXQ</b> | <b>Excision partial, nerve(s) of digit of hand interfascicular split repair [rejoining] technique combined transposition of nerves with a nerve autograft</b>                                                 |
| <b>1JJ50LANR</b>  | <b>Dilation, brachiocephalic arteries open approach using endovascular stent [e.g. Z-stent]</b>                                                                                                               |

|            |                                                                                                                                                                                                                      |
|------------|----------------------------------------------------------------------------------------------------------------------------------------------------------------------------------------------------------------------|
| 1JJ51LA    | Occlusion, brachiocephalic arteries using open approach without tissue [direct repair]                                                                                                                               |
| 1JJ80LAXXN | Repair, brachiocephalic arteries using open approach with synthetic material                                                                                                                                         |
| 1JJ87LA    | Excision partial, brachiocephalic arteries using open approach without tissue [e.g. direct repair or end-to-end anastomosis]                                                                                         |
| 1SN93LAXXE | Amputation, scapula using local flap myoplasty (for closure of stump)                                                                                                                                                |
| 1TQ80LAXXN | Repair, muscles of the forearm [around elbow] using open approach and synthetic tissue [e.g. gortex, mesh or Silastic sheath]                                                                                        |
| 1TQ87LAXXA | Excision partial, muscles of the forearm [around elbow] using autograft [e.g. fascia or skin] (for closure of surgical defect)                                                                                       |
| 1TS80WUNWQ | Repair, tendons of the forearm [around elbow] using tenodesis with screw fixation [e.g. tendon with a bone plug fixed to bone with screw] with combined sources of tissue [e.g. autograft, tendon transfer, goretex] |
| 1TV56JA    | Removal of foreign body, radius and ulna using external (manual extraction) approach                                                                                                                                 |
| 1TV74LALQA | Fixation, radius and ulna open approach with bone autograft using intramedullary nail                                                                                                                                |
| 1TV74LALQN | Fixation, radius and ulna open approach with synthetic tissue [e.g. bone cement or paste] using intramedullary nail                                                                                                  |
| 1TV80LANVK | Repair, radius and ulna with bone homograft using pin, nail                                                                                                                                                          |
| 1TV80LANVQ | Repair, radius and ulna with combined sources of tissue [e.g. bone graft, cement/paste] using pin, nail                                                                                                              |
| 1TV83LAXXK | Transfer, radius and ulna using open approach and bone homograft                                                                                                                                                     |
| 1TV84LAXXE | Construction or reconstruction, radius and ulna using open approach and local rotation flap (muscle and skin to cover each ray)                                                                                      |
| 1TV87LANV  | Excision partial, radius and ulna no tissue used (for closure of defect) using pin, nail                                                                                                                             |
| 1TV87LANVK | Excision partial, radius and ulna with bone homograft [e.g. from bone bank] using pin, nail                                                                                                                          |
| 1TV87LANWK | Excision partial, radius and ulna with bone homograft [e.g. from bone bank] using screw, plate and screw                                                                                                             |
| 1TV91LANWA | Excision radical, radius and ulna with bone autograft using screw, plate and screw                                                                                                                                   |
| 1TX87LAXXQ | Excision partial, soft tissue of arm NEC using open approach and combined sources of tissue [e.g. skin graft with flap] (to close surgical defect)                                                                   |
| 1UB72DA    | Release, wrist joint using endoscopic [arthroscopic] approach                                                                                                                                                        |
| 1UB74DANWN | Fixation, wrist joint endoscopic [arthroscopic] approach with synthetic tissue [e.g. bone cement, or paste] using plate, screw                                                                                       |
| 1UB74DANWQ | Fixation, wrist joint endoscopic [arthroscopic] approach with combined sources of tissue [e.g. bone graft, cement/paste] using plate, screw                                                                          |
| 1UB74LALQK | Fixation, wrist joint open approach with bone homograft using intramedullary nail                                                                                                                                    |
| 1UB74LALQN | Fixation, wrist joint open approach with synthetic tissue [e.g. bone cement, or paste] using intramedullary nail                                                                                                     |
| 1UB75LALQA | Fusion, wrist joint with bone autograft using intramedullary nail                                                                                                                                                    |
| 1UB75LANWN | Fusion, wrist joint with synthetic tissue [e.g. bone cement, paste] using plate, screw                                                                                                                               |

|                   |                                                                                                                                                                           |
|-------------------|---------------------------------------------------------------------------------------------------------------------------------------------------------------------------|
| <b>1UB75LAXXA</b> | <b>Fusion, wrist joint with bone autograft with no device used (for fusion)</b>                                                                                           |
| <b>1UB80DAXXE</b> | <b>Repair, wrist joint endoscopic [arthroscopic] approach using local tendon transfer [rebalancing]</b>                                                                   |
| <b>1UB93LAXXA</b> | <b>Amputation, wrist joint using skin graft (for closure of stump)</b>                                                                                                    |
| <b>1UC55LASL</b>  | <b>Removal of device, distal radioulnar joint and carpal joints and bones of spacer device [e.g. Silastic] using open approach</b>                                        |
| <b>1UC74LANVQ</b> | <b>Fixation, distal radioulnar joint and carpal joints and bones open approach with combined sources of tissue [e.g. bone graft, cement/paste] using pin, nail</b>        |
| <b>1UC80LANWK</b> | <b>Repair, distal radioulnar joint and carpal joints and bones open approach with screw/plate device using homograft</b>                                                  |
| <b>1UC80LANWQ</b> | <b>Repair, distal radioulnar joint and carpal joints and bones open approach with screw/plate using combined sources of tissue [e.g. autograft with synthetic tissue]</b> |
| <b>1UC80LAXXK</b> | <b>Repair, distal radioulnar joint and carpal joints and bones open approach using homograft</b>                                                                          |
| <b>1UE55LANV</b>  | <b>Removal of device, first metacarpal bone of pin/nail using open approach</b>                                                                                           |
| <b>1UE55LANW</b>  | <b>Removal of device, first metacarpal bone of plate/screw using open approach</b>                                                                                        |
| <b>1UE74LAKDN</b> | <b>Fixation, first metacarpal bones open approach with synthetic tissue [e.g. bone cement or paste] using wire, staple</b>                                                |
| <b>1UE74LALQ</b>  | <b>Fixation, first metacarpal bones open approach fixation device alone using intramedullary nail</b>                                                                     |
| <b>1UE74LANVA</b> | <b>Fixation, first metacarpal bones open approach with bone autograft using pin, nail</b>                                                                                 |
| <b>1UE74LANWK</b> | <b>Fixation, first metacarpal bones open approach with bone homograft using plate, screw</b>                                                                              |
| <b>1UE74LANWQ</b> | <b>Fixation, first metacarpal bones open approach with combined sources of tissue [e.g. bone graft, cement/paste] using plate, screw</b>                                  |
| <b>1UE80LAXXA</b> | <b>Repair first metacarpal bone, with bone autograft no device used</b>                                                                                                   |
| <b>1UE80LAXXN</b> | <b>Repair first metacarpal bone, with synthetic tissue [e.g. bone cement, or paste] no device used</b>                                                                    |
| <b>1UE82LANWN</b> | <b>Reattachment, first metacarpal bone using plate/screw fixation with synthetic tissue [e.g. bone cement or paste]</b>                                                   |
| <b>1UE87LAKD</b>  | <b>Excision partial, first metacarpal bone no tissue used (for repair) using wire, staple</b>                                                                             |
| <b>1UF56JA</b>    | <b>Removal of foreign body, other metacarpal bones using external (manual extraction) approach</b>                                                                        |
| <b>1UF74LALQQ</b> | <b>Fixation, other metacarpal bones open approach with combined sources of tissue [e.g. graft &amp; cement/paste] using intramedullary nail</b>                           |
| <b>1UF80LAKDQ</b> | <b>Repair, other metacarpal bones with combined sources of tissue [e.g. bone graft, cement/paste] using wire, staple</b>                                                  |
| <b>1UF80LANVQ</b> | <b>Repair, other metacarpal bones with combined sources of tissue [e.g. bone graft, cement/paste] using pin, nail</b>                                                     |
| <b>1UF80LANWN</b> | <b>Repair, other metacarpal bones with synthetic tissue [e.g. bone cement, or paste] using plate, screw</b>                                                               |
| <b>1UF82LANWA</b> | <b>Reattachment, other metacarpal bones using plate/screw fixation with bone autograft</b>                                                                                |

|            |                                                                                                                                                                               |
|------------|-------------------------------------------------------------------------------------------------------------------------------------------------------------------------------|
| 1UF82LANWN | Reattachment, other metacarpal bones using plate/screw fixation with synthetic tissue [e.g. bone cement or paste]                                                             |
| 1UF87LAKDA | Excision partial, other metacarpal bones with bone autograft (to close defect) using wire, staple                                                                             |
| 1UF87LAKDQ | Excision partial, other metacarpal bones with combined sources of tissue [e.g. bone graft, cement/paste] using wire, staple                                                   |
| 1UF87LANV  | Excision partial, other metacarpal bones no tissue used (for closure of defect) using pin, nail                                                                               |
| 1UG74HALQ  | Fixation, other metacarpophalangeal joint(s) percutaneous approach [closed], fixation device alone using intramedullary nail                                                  |
| 1UG74LANVA | Fixation, other metacarpophalangeal joint(s) open approach with bone autograft using pin, nail                                                                                |
| 1UG74LANWQ | Fixation, other metacarpophalangeal joint(s) open approach with combined sources of tissue [e.g. bone graft, cement/paste] using plate, screw                                 |
| 1UG75LAKDA | Fusion, other metacarpophalangeal joint(s) joint fusion alone with bone autograft using wire, staple, tension band                                                            |
| 1UG75LAKDK | Fusion, other metacarpophalangeal joint(s) joint fusion alone with bone homograft using wire, staple, tension band                                                            |
| 1UG75LANWA | Fusion, other metacarpophalangeal joint(s) joint fusion alone with bone autograft using screw, plate and screw                                                                |
| 1UG75LANWN | Fusion, other metacarpophalangeal joint(s) joint fusion alone with synthetic tissue [e.g. bone cement, paste] using screw, plate and screw                                    |
| 1UG75LAXXA | Fusion, other metacarpophalangeal joint(s) joint fusion alone with bone autograft no device used (for fusion)                                                                 |
| 1UG75VJNV  | Fusion, other metacarpophalangeal joint(s) joint fusion with metacarpal osteotomy no tissue used (for fusion) using pin, nail                                                 |
| 1UG75VJNWA | Fusion, other metacarpophalangeal joint(s) joint fusion with metacarpal osteotomy with bone autograft using screw, plate and screw                                            |
| 1UG75VJNWK | Fusion, other metacarpophalangeal joint(s) joint fusion with metacarpal osteotomy with bone homograft using screw, plate and screw                                            |
| 1UG80LANVA | Repair, other metacarpophalangeal joint(s) joint repair alone with autograft [e.g. bone, interpositional tendon, fascia] using pin, nail                                      |
| 1UG80LANVK | Repair, other metacarpophalangeal joint(s) joint repair alone with bone homograft using pin, nail                                                                             |
| 1UG80LANWQ | Repair, other metacarpophalangeal joint(s) joint repair alone with combined sources of tissue [e.g. bone graft, synthetic tissue] using screw, plate and screw                |
| 1UG80LAXXK | Repair, other metacarpophalangeal joint(s) joint repair alone with bone homograft no device used (for repair)                                                                 |
| 1UG80LAXXN | Repair, other metacarpophalangeal joint(s) joint repair alone with synthetic tissue [e.g. silastic sheath] no device used (for repair)                                        |
| 1UG80VJKDA | Repair, other metacarpophalangeal joint(s) joint repair with metacarpal osteotomy with autograft [e.g. bone, interpositional tendon, fascia] using wire, staple, tension band |
| 1UG80VJKDN | Repair, other metacarpophalangeal joint(s) joint repair with metacarpal osteotomy with synthetic tissue [e.g. silastic sheath] using wire, staple, tension band               |
| 1UG80VJNV  | Repair, other metacarpophalangeal joint(s) joint repair with metacarpal osteotomy no tissue used (for repair) using pin, nail                                                 |

|            |                                                                                                                                                                           |
|------------|---------------------------------------------------------------------------------------------------------------------------------------------------------------------------|
| 1UG80VJNVA | Repair, other metacarpophalangeal joint(s) joint repair with metacarpal osteotomy with autograft [e.g. bone, interpositional tendon, fascia] using pin, nail              |
| 1UG80VJNWA | Repair, other metacarpophalangeal joint(s) joint repair with metacarpal osteotomy with autograft [e.g. bone, interpositional tendon, fascia] using screw, plate and screw |
| 1UH55LAKD  | Removal of device, first metacarpophalangeal joint of wire, staple using open approach                                                                                    |
| 1UH55LANW  | Removal of device, first metacarpophalangeal joint of screw, plate using open approach                                                                                    |
| 1UH74LAKDA | Fixation, first metacarpophalangeal joint open approach with bone autograft using wire, staple, tension band                                                              |
| 1UH74LANVA | Fixation, first metacarpophalangeal joint using open approach with bone autograft using pin, nail                                                                         |
| 1UH75LANWA | Fusion, first metacarpophalangeal joint, joint fusion alone with bone autograft using screw, plate and screw                                                              |
| 1UH80LANVA | Repair, first metacarpophalangeal joint, joint repair alone with autograft [e.g. bone, interpositional tendon, fascia] using pin, nail                                    |
| 1UH80LANWA | Repair, first metacarpophalangeal joint, joint repair alone with autograft [e.g. bone, interpositional tendon, fascia] using screw, plate and screw                       |
| 1UH80LAXXA | Repair, first metacarpophalangeal joint, joint repair alone with autograft [e.g. bone, interpositional tendon, fascia] no device used (for repair)                        |
| 1UH80VJKD  | Repair, first metacarpophalangeal joint, joint repair with metacarpal osteotomy no tissue used (for repair) using wire, staple, tension band                              |
| 1UI55LANW  | Removal of device, first phalanx of hand of plate/screw using open approach                                                                                               |
| 1UI71LAXXQ | Division, first phalanx of hand, division involving skin and soft tissue only [simple syndactyly] using combination of local flap and skin autograft                      |
| 1UI74LANVA | Fixation, first phalanx of hand open approach with bone autograft using pin, nail                                                                                         |
| 1UI74LANVQ | Fixation, first phalanx of hand open approach with combined sources of tissue [e.g. bone graft, cement/paste] using pin, nail                                             |
| 1UI80LAKDA | Repair, first phalanx of hand using autograft [e.g. bone peg] using wire, staple                                                                                          |
| 1UJ71WKXXE | Division, other phalanx of hand division involving bone or joint (complex syndactyly) using local flap [e.g. volar, dorsal]                                               |
| 1UJ74LANVQ | Fixation, other phalanx of hand open approach with combined sources of tissue [e.g. bone graft, cement/paste] using pin, nail                                             |
| 1UJ74LANWQ | Fixation, other phalanx of hand open approach with combined sources of tissue [e.g. bone graft, cement/paste] using plate, screw                                          |
| 1UJ80LAKDK | Repair, other phalanx of hand using bone homograft using wire, staple                                                                                                     |
| 1UK53LAPMN | Implantation of internal device, other interphalangeal joints of hand of cemented single-component prosthetic device using open approach                                  |
| 1UK75HANW  | Fusion, other interphalangeal joints of hand percutaneous approach using screw                                                                                            |
| 1UK80LANVN | Repair, other interphalangeal joints of hand joint repair alone with synthetic tissue [e.g. silastic sheath] using pin, nail                                              |
| 1UK80LAXXN | Repair, other interphalangeal joints of hand joint repair alone with synthetic tissue [e.g. silastic sheath] no device used (for repair)                                  |

|                   |                                                                                                                                                                                                                            |
|-------------------|----------------------------------------------------------------------------------------------------------------------------------------------------------------------------------------------------------------------------|
| <b>1UK80VJNV</b>  | <b>Repair, other interphalangeal joints of hand joint repair with phalangeal osteotomy (for realigning joint) no tissue used (for repair) using pin, nail</b>                                                              |
| <b>1UM55HAKD</b>  | <b>Removal of device, first interphalangeal joint of hand of wire/staple using percutaneous approach</b>                                                                                                                   |
| <b>1UM55LAKD</b>  | <b>Removal of device, first interphalangeal joint of hand of wire/staple/tension band using open approach</b>                                                                                                              |
| <b>1UM80LAKDK</b> | <b>Repair, first interphalangeal joint of hand, joint repair alone with bone homograft using wire, staple, tension band</b>                                                                                                |
| <b>1UM80VJ</b>    | <b>Repair, first interphalangeal joint of hand, joint repair with phalangeal osteotomy (for realigning joint) no tissue used (for repair) no device used (for repair)</b>                                                  |
| <b>1UM80VJNW</b>  | <b>Repair, first interphalangeal joint of hand, joint repair with phalangeal osteotomy (for realigning joint) no tissue used (for repair) using screw, plate and screw</b>                                                 |
| <b>1UT80WUNWQ</b> | <b>Repair, flexor tendons of finger [excludes thumb] using tenodesis with screw fixation [tendon with a bone plug fixed to bone with screw] with combined sources of tissue [e.g. autograft, tendon transfer, goretex]</b> |
| <b>1UU55LASL</b>  | <b>Removal of device, tendons of thumb [Pollicis tendons] of spacer device [e.g. Silastic rod] using open approach</b>                                                                                                     |
| <b>1UU80WUNWA</b> | <b>Repair, tendons of thumb [Pollicis tendons] using tenodesis with screw fixation [tendon with a bone plug fixed to bone with screw] with autograft [e.g. tendon, fascia]</b>                                             |
| <b>1UU80WUNWQ</b> | <b>Repair, tendons of thumb [Pollicis tendons] using tenodesis with screw fixation [tendon with a bone plug fixed to bone with screw] with combined sources of tissue [e.g. autograft, tendon transfer, goretex]</b>       |
| <b>1UU80WUXXQ</b> | <b>Repair, tendons of thumb [Pollicis tendons] using tenodesis technique [tendon looped or sutured to or through bone] with combined sources of tissue [e.g. autograft, tendon transfer, goretex]</b>                      |
| <b>1UV80WUNWA</b> | <b>Repair, tendons of wrist and hand using tenodesis with screw fixation [tendon with a bone plug fixed to bone with screw] with autograft [e.g. tendon, fascia]</b>                                                       |
| <b>1UV80WUXXN</b> | <b>Repair, tendons of wrist and hand using tenodesis technique [tendon looped or sutured to or through bone] with synthetic tissue [e.g. gortex, mesh]</b>                                                                 |
| <b>1YX87LAXXB</b> | <b>Excision partial, nail using open [excisional] approach and split-thickness autograft</b>                                                                                                                               |
| <b>1YX89LAXXB</b> | <b>Excision total, nail using open [excisional] approach and split-thickness autograft</b>                                                                                                                                 |
| <b>2BG70PF</b>    | <b>Inspection, brachial plexus using posterior open approach</b>                                                                                                                                                           |
